# Supplementary material
Source: PubMed Central journal article supplement (PMC3675812)
Supplement: supp_M112.017020_mcp.M112.017020-1.pdf [file supp_M112.017020_mcp.M112.017020-1.pdf]

**<sup>a</sup>Supplemental Table 1. Cellular factors from cured MH 14 cells (HCV negative) associated with biotinylated PNA-streptavidin complex.**

|    | Protein description                                                          | Accession #  | Protein Score | MW [kDa] | Unique Peptides | Coverage |
|----|------------------------------------------------------------------------------|--------------|---------------|----------|-----------------|----------|
| 1  | Acetyl-CoA carboxylase 1 isoform 4                                           | gi 38679974  | 94.72         | 257.1    | 2               | 1.63     |
| 2  | Acetyl-CoA carboxylase 1                                                     | gi 33112885  | 1014          | 265.4    | 13              | 11.6     |
| 3  | Acyl-CoA synthetase 3                                                        | gi 4165018   | 162           | 80.2     | 2               | 4.2      |
| 4  | Albumin, isoform CRA_p                                                       | gi 119626079 | 306.26        | 22.5     | 2               | 7.50     |
| 5  | Chain A, A Crystal Structure Of Ppar Alpha Bound with Src1 Peptide And Gw735 | gi 146387087 | 246.89        | 30.2     | 3               | 13.11    |
| 6  | Chain B, Structural Characterization Of H3k56q Nucleosomes And Nucleo Arrays | gi 295982350 | 613.47        | 9.4      | 5               | 51.81    |
| 7  | Death associated protein 3, isoform CRA_e                                    | gi 119573435 | 113.85        | 35.6     | 3               | 12.26    |
| 8  | Filaggrin-2                                                                  | gi 62122917  | 224.98        | 247.9    | 2               | 1.42     |
| 9  | Glyceraldehyde-3-phosphate dehydrogenase isoform 2                           | gi 378404908 | 268.26        | 31.5     | 3               | 14.68    |
| 10 | Hornerin precursor                                                           | gi 40795897  | 158.65        | 282.2    | 3               | 9.02     |
| 11 | Hypothetical protein                                                         | gi 6808254   | 241.60        | 41.1     | 2               | 10.13    |
| 12 | Immunoglobulin kappa light chain                                             | gi 3169770   | 49.11         | 23.0     | 2               | 16.11    |
| 13 | Methylcrotonoyl-Coenzyme A carboxylase 1 (alpha), isoform CRA_g]             | gi 12276066  | 90            | 48.1     | 13              | 14.8     |
| 14 | Methylcrotonoyl-CoA carboxylase beta chain                                   | gi 11545863  | 483           | 61.2     | 7               | 17.1     |
| 15 | Methylcrotonyl-CoA carboxylase alpha subunit                                 | gi 12276066  | 471           | 80.3     | 7               | 14.8     |
| 16 | Propionyl-CoA carboxylase                                                    | gi 296366    | 232           | 77.3     | 3               | 7.4      |
| 17 | MRPS9 protein, partial                                                       | gi 29126836  | 83.05         | 35.1     | 2               | 7.95     |
| 18 | pyruvate carboxylase                                                         | gi 632808    | 132           | 129530   | 42              | 22.5     |
| 19 | polyubiquitin                                                                | gi 2627129   | 98.10         | 68.4     | 2               | 32.84    |
| 20 | RPL27/NME2 fusion protein                                                    | gi 237687551 | 281.25        | 14.2     | 4               | 38.89    |
| 21 | RPLP1                                                                        | gi 49457412  | 133.83        | 11.6     | 2               | 29.82    |
| 22 | RRBP1 protein, partial                                                       | gi 38014595  | 497.97        | 73.6     | 6               | 13.89    |
| 23 | Serpin B12                                                                   | gi 17998551  | 131.06        | 46.2     | 4               | 14.07    |

<sup>a</sup> The biotinylated PNA-Nea<sub>HCV-Core</sub> conjugate complementary to nucleotide sequence 342-356 of the HCV (+) strand RNA genome was incubated with cured MH14 cells (HCV-negative). The conjugate that penetrated the cells was captured from cell lysate on paramagnetic streptavidin beads. The beads were washed and suspended in SDS gel loading buffer and heated at 90°C for 5 min. Following magnetic separation of beads, the eluate was subjected to LC/MS/MS for identification of cellular proteins bound to the biotinylated PNA-streptavidin complex in the absence of HCV RNA replicons.
