# Supplementary material
Source: PubMed Central journal article supplement (PMC3675812)
Supplement: supp_M112.017020_mcp.M112.017020-2.pdf [file supp_M112.017020_mcp.M112.017020-2.pdf]

## Peptide View

MS/MS Fragmentation of **NLMLSTSEEMIEK**

Found in **gi|6996658**, Apobec-1 complementation factor [Homo sapiens]

Match to Query 82: 1555.539048 from(778.776800,2+) intensity(1235.7059)

Click mouse within plot area to zoom in by factor of two about that point

Or, Plot from  to  Da

Label all possible matches  Label matches used for scoring

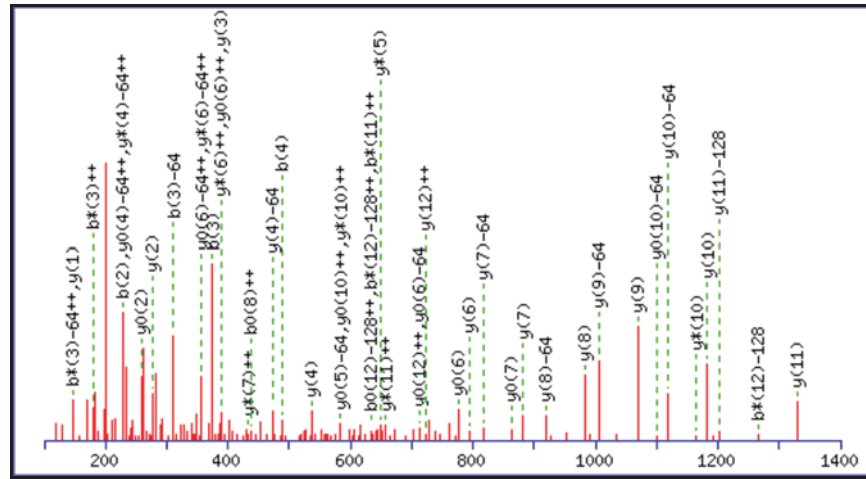

Monoisotopic mass of neutral peptide Mr(calc): 1555.7109

Variable modifications:

**M3** : Oxidation (M), with neutral losses 0.0000 (shown in table), 63.9983

**M10** : Oxidation (M), with neutral losses 0.0000 (shown in table), 63.9983

Ions Score: 49 Expect: 0.0052

Matches : 47/244 fragment ions using 69 most intense peaks [\(help\)](#)

| #  | b               | b <sup>++</sup> | b <sup>*</sup> | b <sup>*++</sup> | b <sup>0</sup> | b <sup>0++</sup> | Seq. | y                | y <sup>++</sup> | y <sup>*</sup>   | y <sup>*++</sup> | y <sup>0</sup>  | y <sup>0++</sup> | #  |
|----|-----------------|-----------------|----------------|------------------|----------------|------------------|------|------------------|-----------------|------------------|------------------|-----------------|------------------|----|
| 1  | 115.0502        | 58.0287         | 98.0237        | 49.5155          |                |                  | N    |                  |                 |                  |                  |                 |                  | 13 |
| 2  | <b>228.1343</b> | 114.5708        | 211.1077       | 106.0575         |                |                  | L    | 1442.6753        | <b>721.8413</b> | 1425.6488        | 713.3280         | 1424.6647       | <b>712.8360</b>  | 12 |
| 3  | <b>375.1697</b> | 188.0885        | 358.1431       | <b>179.5752</b>  |                |                  | M    | <b>1329.5912</b> | 665.2993        | 1312.5647        | <b>656.7860</b>  | 1311.5807       | 656.2940         | 11 |
| 4  | <b>488.2537</b> | 244.6305        | 471.2272       | 236.1172         |                |                  | L    | <b>1182.5558</b> | 591.7816        | <b>1165.5293</b> | <b>583.2683</b>  | 1164.5453       | <b>582.7763</b>  | 10 |
| 5  | 575.2858        | 288.1465        | 558.2592       | 279.6332         | 557.2752       | 279.1412         | S    | <b>1069.4718</b> | 535.2395        | 1052.4452        | 526.7263         | 1051.4612       | 526.2342         | 9  |
| 6  | 676.3334        | 338.6704        | 659.3069       | 330.1571         | 658.3229       | 329.6651         | T    | <b>982.4398</b>  | 491.7235        | 965.4132         | 483.2102         | 964.4292        | 482.7182         | 8  |
| 7  | 763.3655        | 382.1864        | 746.3389       | 373.6731         | 745.3549       | 373.1811         | S    | <b>881.3921</b>  | 441.1997        | 864.3655         | <b>432.6864</b>  | <b>863.3815</b> | 432.1944         | 7  |
| 8  | 892.4081        | 446.7077        | 875.3815       | 438.1944         | 874.3975       | <b>437.7024</b>  | E    | <b>794.3600</b>  | 397.6837        | 777.3335         | <b>389.1704</b>  | <b>776.3495</b> | <b>388.6784</b>  | 6  |
| 9  | 1021.4507       | 511.2290        | 1004.4241      | 502.7157         | 1003.4401      | 502.2237         | E    | 665.3175         | 333.1624        | <b>648.2909</b>  | 324.6491         | 647.3069        | 324.1571         | 5  |
| 10 | 1168.4861       | 584.7467        | 1151.4595      | 576.2334         | 1150.4755      | 575.7414         | M    | <b>536.2749</b>  | 268.6411        | 519.2483         | 260.1278         | 518.2643        | 259.6358         | 4  |
| 11 | 1281.5701       | 641.2887        | 1264.5436      | <b>632.7754</b>  | 1263.5596      | 632.2834         | I    | <b>389.2395</b>  | 195.1234        | 372.2129         | 186.6101         | 371.2289        | 186.1181         | 3  |
| 12 | 1410.6127       | 705.8100        | 1393.5862      | 697.2967         | 1392.6021      | 696.8047         | E    | <b>276.1554</b>  | 138.5813        | 259.1288         | 130.0681         | <b>258.1448</b> | 129.5761         | 2  |
| 13 |                 |                 |                |                  |                |                  | K    | <b>147.1128</b>  | 74.0600         | 130.0863         | 65.5468          |                 |                  | 1  |

# Peptide View

MS/MS Fragmentation of **DGSLASNPYSGDLTK**

Found in **gi|11990132**, NICE-4 protein [Homo sapiens]

Match to Query 69: 1523.711248 from(762.862900,2+) intensity(263.4501)

Click mouse within plot area to zoom in by factor of two about that point

Or, Plot from  to  Da

Label all possible matches  Label matches used for scoring

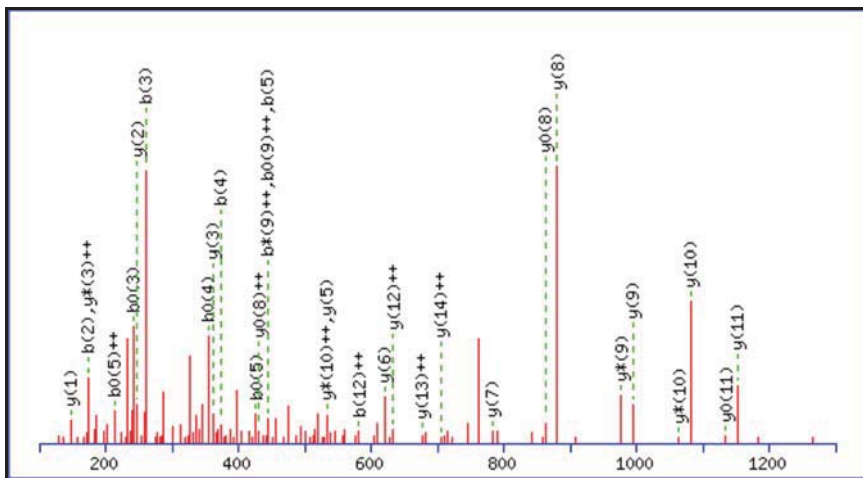

Monoisotopic mass of neutral peptide Mr(calc) : 1523.7104

Ions Score: 50 Expect: 0.0059

Matches : 31/154 fragment ions using 61 most intense peaks [\(help\)](#)

| #  | b               | b <sup>++</sup> | b <sup>*</sup> | b <sup>*++</sup> | b <sup>0</sup>  | b <sup>0++</sup> | Seq. | y                | y <sup>++</sup> | y <sup>*</sup>   | y <sup>*++</sup> | y <sup>0</sup>   | y <sup>0++</sup> | #  |
|----|-----------------|-----------------|----------------|------------------|-----------------|------------------|------|------------------|-----------------|------------------|------------------|------------------|------------------|----|
| 1  | 116.0342        | 58.5207         |                |                  | 98.0237         | 49.5155          | D    |                  |                 |                  |                  |                  |                  | 15 |
| 2  | <b>173.0557</b> | 87.0315         |                |                  | 155.0451        | 78.0262          | G    | 1409.6907        | <b>705.3490</b> | 1392.6642        | 696.8357         | 1391.6801        | 696.3437         | 14 |
| 3  | <b>260.0877</b> | 130.5475        |                |                  | <b>242.0771</b> | 121.5422         | S    | 1352.6692        | <b>676.8383</b> | 1335.6427        | 668.3250         | 1334.6587        | 667.8330         | 13 |
| 4  | <b>373.1718</b> | 187.0895        |                |                  | <b>355.1612</b> | 178.0842         | L    | 1265.6372        | <b>633.3222</b> | 1248.6107        | 624.8090         | 1247.6266        | 624.3170         | 12 |
| 5  | <b>444.2089</b> | 222.6081        |                |                  | <b>426.1983</b> | <b>213.6028</b>  | A    | <b>1152.5531</b> | 576.7802        | 1135.5266        | 568.2669         | <b>1134.5426</b> | 567.7749         | 11 |
| 6  | 531.2409        | 266.1241        |                |                  | 513.2304        | 257.1188         | S    | <b>1081.5160</b> | 541.2617        | <b>1064.4895</b> | <b>532.7484</b>  | 1063.5055        | 532.2564         | 10 |
| 7  | 645.2838        | 323.1456        | 628.2573       | 314.6323         | 627.2733        | 314.1403         | N    | <b>994.4840</b>  | 497.7456        | <b>977.4575</b>  | 489.2324         | 976.4734         | 488.7404         | 9  |
| 8  | 742.3366        | 371.6719        | 725.3101       | 363.1587         | 724.3260        | 362.6667         | P    | <b>880.4411</b>  | 440.7242        | 863.4145         | 432.2109         | <b>862.4305</b>  | <b>431.7189</b>  | 8  |
| 9  | 905.3999        | 453.2036        | 888.3734       | <b>444.6903</b>  | 887.3894        | <b>444.1983</b>  | Y    | <b>783.3883</b>  | 392.1978        | 766.3618         | 383.6845         | 765.3777         | 383.1925         | 7  |
| 10 | 992.4320        | 496.7196        | 975.4054       | 488.2063         | 974.4214        | 487.7143         | S    | <b>620.3250</b>  | 310.6661        | 603.2984         | 302.1529         | 602.3144         | 301.6608         | 6  |
| 11 | 1049.4534       | 525.2304        | 1032.4269      | 516.7171         | 1031.4429       | 516.2251         | G    | <b>533.2930</b>  | 267.1501        | 516.2664         | 258.6368         | 515.2824         | 258.1448         | 5  |
| 12 | 1164.4804       | <b>582.7438</b> | 1147.4538      | 574.2305         | 1146.4698       | 573.7385         | D    | 476.2715         | 238.6394        | 459.2449         | 230.1261         | 458.2609         | 229.6341         | 4  |
| 13 | 1277.5644       | 639.2859        | 1260.5379      | 630.7726         | 1259.5539       | 630.2806         | L    | <b>361.2445</b>  | 181.1259        | 344.2180         | <b>172.6126</b>  | 343.2340         | 172.1206         | 3  |
| 14 | 1378.6121       | 689.8097        | 1361.5856      | 681.2964         | 1360.6015       | 680.8044         | T    | <b>248.1605</b>  | 124.5839        | 231.1339         | 116.0706         | 230.1499         | 115.5786         | 2  |
| 15 |                 |                 |                |                  |                 |                  | K    | <b>147.1128</b>  | 74.0600         | 130.0863         | 65.5468          |                  |                  | 1  |

# Peptide View

MS/MS Fragmentation of **IVAERPGTNSTGPAPMAPPR**

Found in **gi|1699027**, nuclear corepressor KAP-1 [Homo sapiens]

Match to Query 120: 2034.029472 from(679.017100,3+) intensity(353.5331)

Click mouse within plot area to zoom in by factor of two about that point

Or, Plot from  to  Da

Label all possible matches  Label matches used for scoring

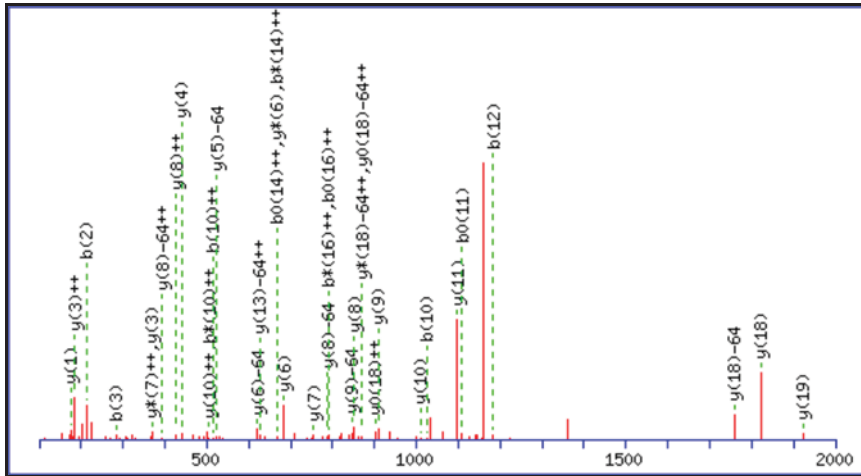

Monoisotopic mass of neutral peptide Mr(calc): 2034.0316

Variable modifications:

M16 : Oxidation (M), with neutral losses 0.0000 (shown in table), 63.9983

Ions Score: 42 Expect: 0.034

Matches : 37/300 fragment ions using 74 most intense peaks ([help](#))

| #  | b                | b <sup>++</sup> | b <sup>*</sup> | b <sup>*++</sup> | b <sup>0</sup>   | b <sup>0++</sup> | Seq. | y                | y <sup>++</sup> | y <sup>*</sup>  | y <sup>*++</sup> | y <sup>0</sup> | y <sup>0++</sup> | #  |
|----|------------------|-----------------|----------------|------------------|------------------|------------------|------|------------------|-----------------|-----------------|------------------|----------------|------------------|----|
| 1  | 114.0913         | 57.5493         |                |                  |                  |                  | I    |                  |                 |                 |                  |                |                  | 20 |
| 2  | <b>213.1598</b>  | 107.0835        |                |                  |                  |                  | V    | <b>1921.9549</b> | 961.4811        | 1904.9283       | 952.9678         | 1903.9443      | 952.4758         | 19 |
| 3  | <b>284.1969</b>  | 142.6021        |                |                  |                  |                  | A    | <b>1822.8865</b> | 911.9469        | 1805.8599       | 903.4336         | 1804.8759      | <b>902.9416</b>  | 18 |
| 4  | 413.2395         | 207.1234        |                |                  | 395.2289         | 198.1181         | E    | 1751.8493        | 876.4283        | 1734.8228       | 867.9150         | 1733.8388      | 867.4230         | 17 |
| 5  | 569.3406         | 285.1739        | 552.3140       | 276.6606         | 551.3300         | 276.1686         | R    | 1622.8068        | 811.9070        | 1605.7802       | 803.3937         | 1604.7962      | 802.9017         | 16 |
| 6  | 666.3933         | 333.7003        | 649.3668       | 325.1870         | 648.3828         | 324.6950         | P    | 1466.7056        | 733.8565        | 1449.6791       | 725.3432         | 1448.6951      | 724.8512         | 15 |
| 7  | 723.4148         | 362.2110        | 706.3883       | 353.6978         | 705.4042         | 353.2058         | G    | 1369.6529        | 685.3301        | 1352.6263       | 676.8168         | 1351.6423      | 676.3248         | 14 |
| 8  | 824.4625         | 412.7349        | 807.4359       | 404.2216         | 806.4519         | 403.7296         | T    | 1312.6314        | 656.8193        | 1295.6049       | 648.3061         | 1294.6208      | 647.8141         | 13 |
| 9  | 938.5054         | 469.7563        | 921.4789       | 461.2431         | 920.4948         | 460.7511         | N    | 1211.5837        | 606.2955        | 1194.5572       | 597.7822         | 1193.5732      | 597.2902         | 12 |
| 10 | <b>1025.5374</b> | <b>513.2724</b> | 1008.5109      | <b>504.7591</b>  | 1007.5269        | 504.2671         | S    | <b>1097.5408</b> | 549.2740        | 1080.5143       | 540.7608         | 1079.5302      | 540.2688         | 11 |
| 11 | 1126.5851        | 563.7962        | 1109.5586      | 555.2829         | <b>1108.5745</b> | 554.7909         | T    | <b>1010.5088</b> | <b>505.7580</b> | 993.4822        | 497.2448         | 992.4982       | 496.7527         | 10 |
| 12 | <b>1183.6066</b> | 592.3069        | 1166.5800      | 583.7937         | 1165.5960        | 583.3016         | G    | <b>909.4611</b>  | 455.2342        | 892.4346        | 446.7209         |                |                  | 9  |
| 13 | 1280.6593        | 640.8333        | 1263.6328      | 632.3200         | 1262.6488        | 631.8280         | P    | <b>852.4396</b>  | <b>426.7235</b> | 835.4131        | 418.2102         |                |                  | 8  |
| 14 | 1351.6965        | 676.3519        | 1334.6699      | <b>667.8386</b>  | 1333.6859        | <b>667.3466</b>  | A    | <b>755.3869</b>  | 378.1971        | 738.3603        | <b>369.6838</b>  |                |                  | 7  |
| 15 | 1448.7492        | 724.8782        | 1431.7227      | 716.3650         | 1430.7387        | 715.8730         | P    | <b>684.3498</b>  | 342.6785        | <b>667.3232</b> | 334.1652         |                |                  | 6  |
| 16 | 1595.7846        | 798.3959        | 1578.7581      | <b>789.8827</b>  | 1577.7741        | <b>789.3907</b>  | M    | 587.2970         | 294.1521        | 570.2704        | 285.6389         |                |                  | 5  |
| 17 | 1666.8217        | 833.9145        | 1649.7952      | 825.4012         | 1648.8112        | 824.9092         | A    | <b>440.2616</b>  | 220.6344        | 423.2350        | 212.1212         |                |                  | 4  |
| 18 | 1763.8745        | 882.4409        | 1746.8479      | 873.9276         | 1745.8639        | 873.4356         | P    | <b>369.2245</b>  | <b>185.1159</b> | 352.1979        | 176.6026         |                |                  | 3  |
| 19 | 1860.9273        | 930.9673        | 1843.9007      | 922.4540         | 1842.9167        | 921.9620         | P    | 272.1717         | 136.5895        | 255.1452        | 128.0762         |                |                  | 2  |
| 20 |                  |                 |                |                  |                  |                  | R    | <b>175.1190</b>  | 88.0631         | 158.0924        | 79.5498          |                |                  | 1  |

# Peptide View

MS/MS Fragmentation of **FMQTFVLAPEGSVANK**

Found in **gi|5031703**, ras GTPase-activating protein-binding protein 1 [Homo sapiens]

Match to Query 111: 1753.682248 from(877.848400,2+) intensity(2393.7693)

Click mouse within plot area to zoom in by factor of two about that point

Or, Plot from  to  Da

Label all possible matches  Label matches used for scoring

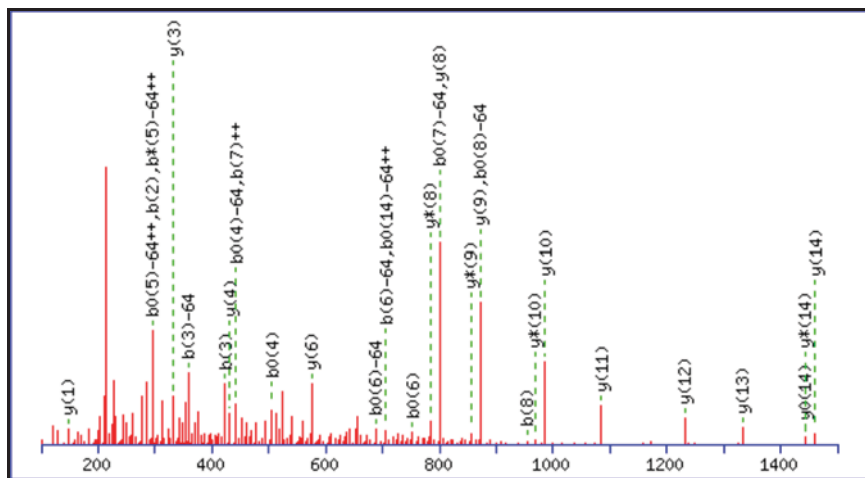

Monoisotopic mass of neutral peptide  $M_r(\text{calc})$ : 1753.8709

Variable modifications:

M2 : Oxidation (M), with neutral losses 0.0000 (shown in table), 63.9983

Ions Score: 73 Expect: 2.7e-05

Matches : 31/246 fragment ions using 40 most intense peaks [\(help\)](#)

| #  | b               | b <sup>++</sup> | b*        | b <sup>*++</sup> | b <sup>0</sup>  | b <sup>0++</sup> | Seq. | y                | y <sup>++</sup> | y*               | y <sup>*++</sup> | y <sup>0</sup>   | y <sup>0++</sup> | #  |
|----|-----------------|-----------------|-----------|------------------|-----------------|------------------|------|------------------|-----------------|------------------|------------------|------------------|------------------|----|
| 1  | 148.0757        | 74.5415         |           |                  |                 |                  | F    |                  |                 |                  |                  |                  |                  | 16 |
| 2  | <b>295.1111</b> | 148.0592        |           |                  |                 |                  | M    | 1607.8098        | 804.4085        | 1590.7832        | 795.8952         | 1589.7992        | 795.4032         | 15 |
| 3  | <b>423.1697</b> | 212.0885        | 406.1431  | 203.5752         |                 |                  | Q    | <b>1460.7744</b> | 730.8908        | <b>1443.7478</b> | 722.3775         | <b>1442.7638</b> | 721.8855         | 14 |
| 4  | 524.2173        | 262.6123        | 507.1908  | 254.0990         | <b>506.2068</b> | 253.6070         | T    | <b>1332.7158</b> | 666.8615        | 1315.6892        | 658.3483         | 1314.7052        | 657.8563         | 13 |
| 5  | 671.2858        | 336.1465        | 654.2592  | 327.6332         | 653.2752        | 327.1412         | F    | <b>1231.6681</b> | 616.3377        | 1214.6416        | 607.8244         | 1213.6575        | 607.3324         | 12 |
| 6  | 770.3542        | 385.6807        | 753.3276  | 377.1675         | <b>752.3436</b> | 376.6754         | V    | <b>1084.5997</b> | 542.8035        | 1067.5732        | 534.2902         | 1066.5891        | 533.7982         | 11 |
| 7  | 883.4382        | <b>442.2228</b> | 866.4117  | 433.7095         | 865.4277        | 433.2175         | L    | <b>985.5313</b>  | 493.2693        | <b>968.5047</b>  | 484.7560         | 967.5207         | 484.2640         | 10 |
| 8  | <b>954.4754</b> | 477.7413        | 937.4488  | 469.2280         | 936.4648        | 468.7360         | A    | <b>872.4472</b>  | 436.7272        | <b>855.4207</b>  | 428.2140         | 854.4367         | 427.7220         | 9  |
| 9  | 1051.5281       | 526.2677        | 1034.5016 | 517.7544         | 1033.5176       | 517.2624         | P    | <b>801.4101</b>  | 401.2087        | <b>784.3836</b>  | 392.6954         | 783.3995         | 392.2034         | 8  |
| 10 | 1180.5707       | 590.7890        | 1163.5442 | 582.2757         | 1162.5601       | 581.7837         | E    | 704.3573         | 352.6823        | 687.3308         | 344.1690         | 686.3468         | 343.6770         | 7  |
| 11 | 1237.5922       | 619.2997        | 1220.5656 | 610.7865         | 1219.5816       | 610.2944         | G    | <b>575.3148</b>  | 288.1610        | 558.2882         | 279.6477         | 557.3042         | 279.1557         | 6  |
| 12 | 1324.6242       | 662.8157        | 1307.5977 | 654.3025         | 1306.6136       | 653.8105         | S    | 518.2933         | 259.6503        | 501.2667         | 251.1370         | 500.2827         | 250.6450         | 5  |
| 13 | 1423.6926       | 712.3499        | 1406.6661 | 703.8367         | 1405.6821       | 703.3447         | V    | <b>431.2613</b>  | 216.1343        | 414.2347         | 207.6210         |                  |                  | 4  |
| 14 | 1494.7297       | 747.8685        | 1477.7032 | 739.3552         | 1476.7192       | 738.8632         | A    | <b>332.1928</b>  | 166.6001        | 315.1663         | 158.0868         |                  |                  | 3  |
| 15 | 1608.7727       | 804.8900        | 1591.7461 | 796.3767         | 1590.7621       | 795.8847         | N    | 261.1557         | 131.0815        | 244.1292         | 122.5682         |                  |                  | 2  |
| 16 |                 |                 |           |                  |                 |                  | K    | <b>147.1128</b>  | 74.0600         | 130.0863         | 65.5468          |                  |                  | 1  |

# Peptide View

## MS/MS Fragmentation of **GATQQILDEAER**

Found in [gi|5453603](#), T-complex protein 1 subunit beta isoform 1 [Homo sapiens]

Match to Query 61: 1329.522648 from(665.768600,2+) intensity(352.0675)

Click mouse within plot area to zoom in by factor of two about that point

Or,   to  Da

Label all possible matches  Label matches used for scoring

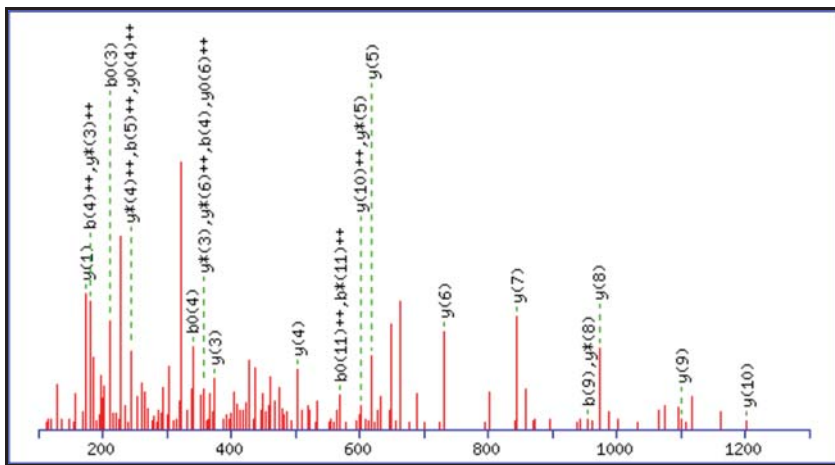

Monoisotopic mass of neutral peptide  $M_r(\text{calc})$ : 1329.6524

Ions Score: 41 Expect: 0.05

Matches : 26/120 fragment ions using 43 most intense peaks ([help](#))

| #  | b               | b <sup>++</sup> | b*        | b <sup>*++</sup> | b <sup>0</sup>  | b <sup>0++</sup> | Seq.     | y                | y <sup>++</sup> | y*              | y <sup>*++</sup> | y <sup>0</sup> | y <sup>0++</sup> | #         |
|----|-----------------|-----------------|-----------|------------------|-----------------|------------------|----------|------------------|-----------------|-----------------|------------------|----------------|------------------|-----------|
| 1  | 58.0287         | 29.5180         |           |                  |                 |                  | <b>G</b> |                  |                 |                 |                  |                |                  | <b>12</b> |
| 2  | 129.0659        | 65.0366         |           |                  |                 |                  | <b>A</b> | 1273.6383        | 637.3228        | 1256.6117       | 628.8095         | 1255.6277      | 628.3175         | <b>11</b> |
| 3  | 230.1135        | 115.5604        |           |                  | 212.1030        | 106.5551         | <b>T</b> | <b>1202.6012</b> | <b>601.8042</b> | 1185.5746       | 593.2909         | 1184.5906      | 592.7989         | <b>10</b> |
| 4  | <b>358.1721</b> | <b>179.5897</b> | 341.1456  | 171.0764         | <b>340.1615</b> | 170.5844         | <b>Q</b> | <b>1101.5535</b> | 551.2804        | 1084.5269       | 542.7671         | 1083.5429      | 542.2751         | <b>9</b>  |
| 5  | 486.2307        | <b>243.6190</b> | 469.2041  | 235.1057         | 468.2201        | 234.6137         | <b>Q</b> | <b>973.4949</b>  | 487.2511        | <b>956.4684</b> | 478.7378         | 955.4843       | 478.2458         | <b>8</b>  |
| 6  | 599.3148        | 300.1610        | 582.2882  | 291.6477         | 581.3042        | 291.1557         | <b>I</b> | <b>845.4363</b>  | 423.2218        | 828.4098        | 414.7085         | 827.4258       | 414.2165         | <b>7</b>  |
| 7  | 712.3988        | 356.7030        | 695.3723  | 348.1898         | 694.3883        | 347.6978         | <b>L</b> | <b>732.3523</b>  | 366.6798        | 715.3257        | <b>358.1665</b>  | 714.3417       | <b>357.6745</b>  | <b>6</b>  |
| 8  | 827.4258        | 414.2165        | 810.3992  | 405.7032         | 809.4152        | 405.2112         | <b>D</b> | <b>619.2682</b>  | 310.1377        | <b>602.2416</b> | 301.6245         | 601.2576       | 301.1325         | <b>5</b>  |
| 9  | <b>956.4684</b> | 478.7378        | 939.4418  | 470.2245         | 938.4578        | 469.7325         | <b>E</b> | <b>504.2413</b>  | 252.6243        | 487.2147        | <b>244.1110</b>  | 486.2307       | <b>243.6190</b>  | <b>4</b>  |
| 10 | 1027.5055       | 514.2564        | 1010.4789 | 505.7431         | 1009.4949       | 505.2511         | <b>A</b> | <b>375.1987</b>  | 188.1030        | <b>358.1721</b> | <b>179.5897</b>  | 357.1881       | 179.0977         | <b>3</b>  |
| 11 | 1156.5481       | 578.7777        | 1139.5215 | <b>570.2644</b>  | 1138.5375       | <b>569.7724</b>  | <b>E</b> | 304.1615         | 152.5844        | 287.1350        | 144.0711         | 286.1510       | 143.5791         | <b>2</b>  |
| 12 |                 |                 |           |                  |                 |                  | <b>R</b> | <b>175.1190</b>  | 88.0631         | 158.0924        | 79.5498          |                |                  | <b>1</b>  |
